# Supplementary material for: Relationship between eHealth, Perceived Risk, and Phobia of COVID-19 among Chinese University Students in Korea and China
Source: Hindawi journal article supplement (doi:10.1155/2023/2755354), 2023-02-24
Supplement: f1 [file 2755354.f1.zip]

Archive with 2 entries (2 files):
- sup-0001-AppendixS1.docx
- sup-0001-AppendixS2.docx
