# Supplementary material for: Relationship between eHealth, Perceived Risk, and Phobia of COVID-19 among Chinese University Students in Korea and China
Source: Hindawi journal article supplement (doi:10.1155/2023/2755354), 2023-02-24
Supplement: f1 [file 2755354.f1.zip › sup-0001-AppendixS1.docx]

Appendix

**Table S1. Additional Information of Chinese University Students in Korea and China mainland**

| Items | Korea (N=319) | China (N=788) |
| --- | --- | --- |
| University student (1st Grade) | 17 | 50 |
| University student (2nd Grade) | 11 | 101 |
| University student (3rd Grade) | 15 | 167 |
| University student (4th Grade) | 16 | 141 |
| Master student | 129 | 295 |
| Doctoral student | 124 | 22 |
| Others (e.g: language school) | 7 | 12 |
