# Supplementary material for: Relationship between eHealth, Perceived Risk, and Phobia of COVID-19 among Chinese University Students in Korea and China
Source: Hindawi journal article supplement (doi:10.1155/2023/2755354), 2023-02-24
Supplement: f1 [file 2755354.f1.zip › sup-0001-AppendixS2.docx]

Appendix

**Table S2. AMOS Bootstrapping analysis of eHealth literacy level on the perceived risk and phobia of COVID-19**

| Path items | Mainland group (N = 788) | | | International group (N=319) | | |
| --- | --- | --- | --- | --- | --- | --- |
| direct effects | indirect effects | Total effects | direct effects | indirect effects | Total effects |
| eHealth -> Use frequency | 0.161* | - | 0.161* | 0.216* | - | 0.216* |
| eHealth -> Information trust | 0.398* | 0.040** | 0.438** | 0.138* | 0.078* | 0.216* |
| Use frequency -> Information trust | 0.252** | - | 0.252** | 0.360* | - | 0.036* |
| Use frequency ->Perceived risk | -0.318* | 0.069** | -0.248* | 0.195 | 0.021 | 0.216* |
| Information trust -> Perceived risk | 0.276** | - | 0.276** | 0.058 | - | 0.058 |
| Use frequency -> Phobia of COVID-19 | 0.096* | -0.132* | -0.036 | 0.247* | 0.124* | 0.371** |
| Perceived risk -> Phobia of COVID-19 | 0.544* | - | 0.544* | 0.468* | - | 0.468* |
| Information trust -> Phobia of COVID-19 | 0.013 | 0.150** | 0.163** | 0.064 | 0.027 | 0.091 |
| eHealth -> Perceived risk | - | 0.070* | 0.070* | - | 0.054* | 0.054* |
| eHealth -> Phobia of COVID-19 | - | 0.059* | 0.059* | - | 0.093* | 0.093* |

*Note*: * *p* < 0.05, ** *p* < 0.01, *** *p* < 0.001
